# Supplementary material for: N-3 long-chain polyunsaturated fatty acids and risk of all-cause mortality among general populations: a meta-analysis
Source: PubMed Central journal article supplement (PMC4910132; doi:10.1038/srep28165), 2016-06-16
Supplement: srep28165-s1.pdf [file srep28165-s1.pdf]

## **N-3 long-chain polyunsaturated fatty acids and risk of all-cause mortality among general populations: a meta-analysis**

Guo-Chong Chen<sup>1</sup>, Jing Yang<sup>1,2</sup>, Manfred Eggersdorfer<sup>3</sup>, Weiguo Zhang<sup>4\*</sup>, and Li-Qiang Qin<sup>1\*</sup>

<sup>1</sup>Department of Nutrition and Food Hygiene, School of Public Health, Soochow University, Suzhou, China.

<sup>2</sup>Department of Nutrition, the First Affiliated Hospital of Soochow University, Suzhou, China

<sup>3</sup>DSM Nutrition Products, Human Nutrition and Health, Kaiseraugst, Switzerland

<sup>4</sup>DSM Nutrition Products, Human Nutrition and Health, Beijing, China

Supplementary figure captions:

Supplementary Figure S1. Risk estimates of all-cause mortality for an increase in long-chain n-3 fatty acids intake of 0.3 g/d in individual studies and all combined. F, female; M, male.

Supplementary Figure S2. Risk estimates of all-cause mortality for each 1% increment in the proportions of circulating eicosapentaenoic acid (EPA) and docosahexaenoic acid (DHA) to total fatty acids in blood for individual studies and all combined. F, female; M, male.

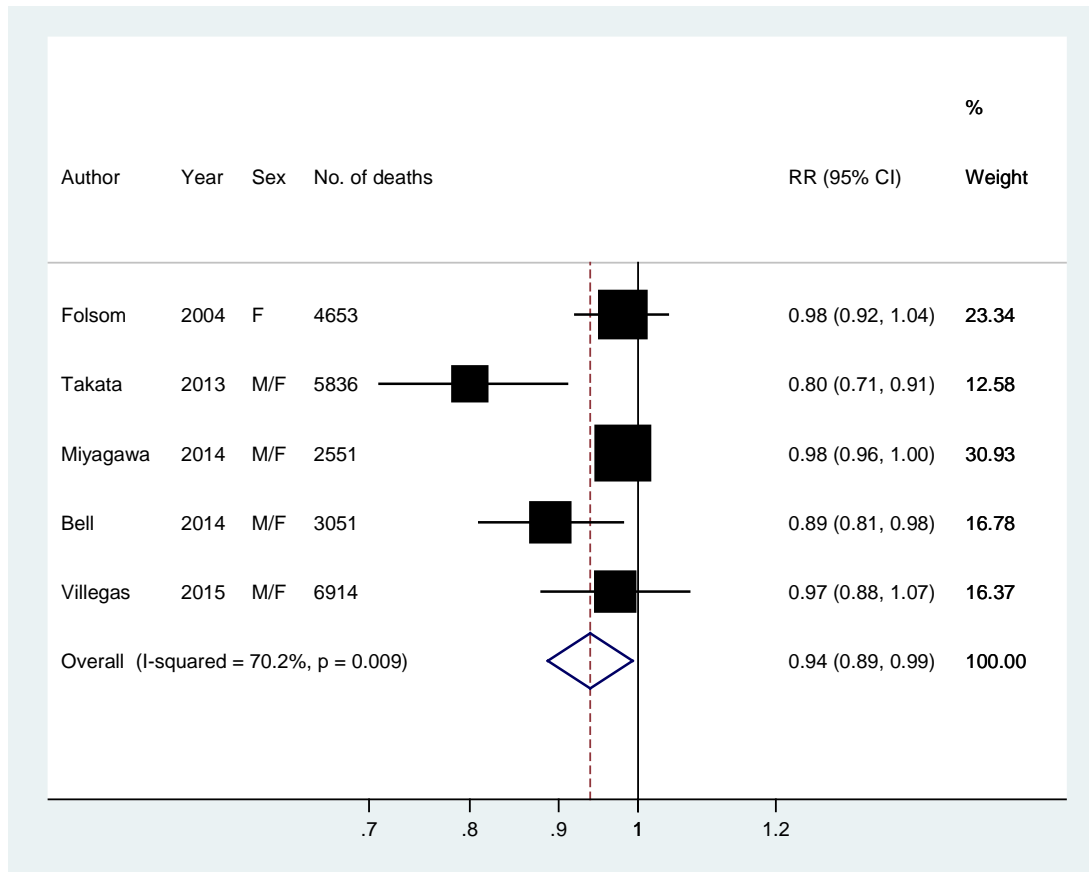

Supplementary Figure S1: Risk estimates of all-cause mortality for an increase in long-chain n-3 fatty acids intake of 0.3 g/d in individual studies and all combined. F, female; M, male.

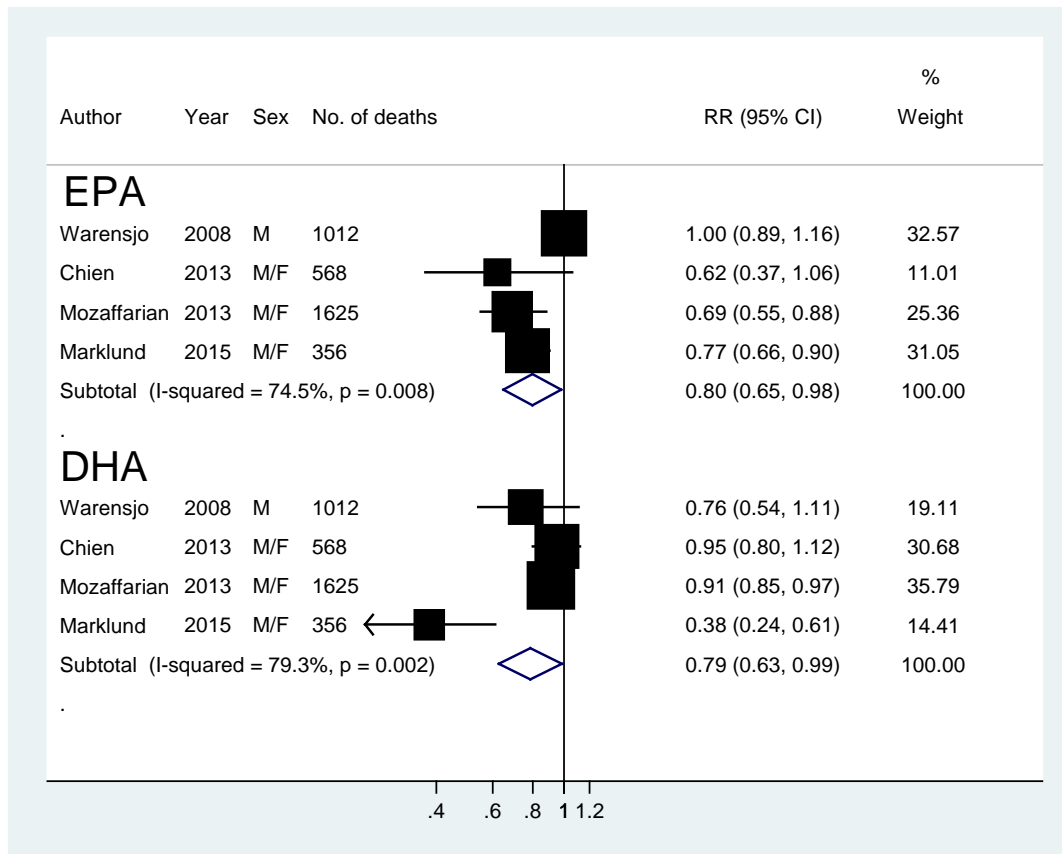

Supplementary Figure S2: Risk estimates of all-cause mortality for each 1% increment in the proportions of circulating eicosapentaenoic acid (EPA) and docosahexaenoic acid (DHA) to total fatty acids in blood for individual studies and all combined. F, female; M, male.
